# Supplementary material for: Value of magnetic resonance angiography before prostatic artery embolization for intervention planning
Source: Research Square preprint supplement (doi:10.21203/rs.3.rs-2872395/v1), 2023-05-22
Supplement: Supplementary file 1 [file 93c30f15c5149e480ebeb682.docx]

**Supp. Tab. 1:** MRI sequences parameter.

| **Sequence** | **Localizer** | **T2w**  **ax** | **T2w**  **cor** | **T2w sag** | **Ptx-EPI DWI** | **T1w vibe iso**  **ax** |
| --- | --- | --- | --- | --- | --- | --- |
| **TE (ms)** | 106 | 102 | 99 | 101 | 67 | 6.47 |
| **TR (ms)** | 1000 | 3990 | 3880 | 4060 | 3500 | 2.46 |
| **Slice thickness (mm)** | 6 | 3 | 3 | 3 | 3 | 1.5 |
| **Number of slices (n)** | 24 | 32 | 22 | 20 | 24 | 208 |
| **FOV (mm)** | 380x380 | 160x160 | 170x170 | 170x170 | 91x150 | 300x300 |
| **Flip angle (deg)** | 20 | 150 | 137 | 134 | 90 | 10 |
| **Acquisition time (min)** | 0:43 | 5:19 | 4:16 | 3:23 | 3:35 | 4:06 |

*Magnetom PRISMA, Siemens*

*ptx EPI = parallel transmit echo planar imaging; TE = time of echo; TR = time of repetition; FOV = field of view*

**Supp. table 2:** Baseline characteristics.

|  | **Patients (n=78)** |
| --- | --- |
| **Age** years,  median (IQR) | 71 (66 – 77) |
| **BMI** kg/m²,  median (IQR) | 26.1 (23.8 – 28.7) |
| **PSA** ng/ml,  median (IQR) | 5.5 (3.4 - 10.5) |
| **PIRADS classification**  Median (IQR) | 2 (2 - 2) |
| **Volume** ml  Median (IQR) | 88 (64 – 124) |

*BMI = Body mass index; PSA = prostate specific antigen; PIRADS = prostate imaging reporting and data system; IQR = Interquartile range*

**Supp. Tab. 3:** PA type left versus right for DSA for patients with both left and right PA.

| **DSA** | | **right** | | | | | |
| --- | --- | --- | --- | --- | --- | --- | --- |
| Type 1 | Type 2 | Type 3 | Type 4 | Other | Total |
| **left** | Type 1 | 14 | 3 | 2 | 4 | 0 | 23 |
| Type 2 | 2 | 11 | 0 | 0 | 0 | 13 |
| Type 3 | 3 | 4 | 10 | 1 | 0 | 18 |
| Type 4 | 6 | 4 | 1 | 7 | 0 | 18 |
| Other | 2 | 0 | 0 | 0 | 0 | 2 |
| Total | 27 | 22 | 13 | 12 | 0 | 74 |

*DSA = digital subtraction angiography; PA = prostatic artery*

**Supp. Tab. 4:** Cross table PA type DSA versus MRA.

|  | | **DSA** | | | | | |
| --- | --- | --- | --- | --- | --- | --- | --- |
| Type 1 | Type 2 | Type 3 | Type 4 | Other | Total |
| **MRA** | Type 1 | 38 | 0 | 3 | 1 | 1 | 43 |
| Type 2 | 5 | 33 | 0 | 2 | 0 | 40 |
| Type 3 | 3 | 1 | 28 | 1 | 0 | 33 |
| Type 4 | 4 | 0 | 0 | 26 | 0 | 30 |
| other | 0 | 0 | 0 | 0 | 1 | 1 |
| total | 50 | 34 | 31 | 30 | 2 | 147 |

**Overall accuracy: (126/147, 86%**; 95% CI: (0.79, 0.91)

*DSA = digital subtraction angiography; MRA = magnetic resonance angiography*
